# Supplementary material
Source: PubMed Central journal article supplement (PMC4321261)
Supplement: pnas.201410715SI.pdf [file pnas.201410715SI.pdf]

# Supporting Information

Wang et al. 10.1073/pnas.1410715112

## SI Text

### Treatment Systems for Wastewater Treatment Plants

The most common form of energy production from wastewater is generation and collection of CH<sub>4</sub>-containing biogas during anaerobic digestion of waste-activated sludge (WAS) (1). Anaerobic systems are used globally, and the produced CH<sub>4</sub> can be combusted onsite to generate heat or electricity or cleaned and sold to a local natural gas provider or used as fuel for vehicles. Recycling of WAS on agricultural fields is a well-documented application for both waste disposal and plant nutrient recycling that is becoming increasingly common in both developed and developing countries (2). In addition, there have been new developments in capturing fertilizers, e.g., struvite (NH<sub>4</sub>MgPO<sub>4</sub>·6H<sub>2</sub>O), from WAS (3). The resource recovery practices included in this study were selected based on these available options. Six typical wastewater treatment alternatives (Table S2) were selected as the control and alternative WWTP approaches for treating 2 × 10<sup>5</sup> m<sup>3</sup>/d of raw municipal wastewater having 500 mg/L chemical oxygen demand (COD), 50 mg N/L, and 12 mg P/L. Detailed information on the six alternative wastewater treatment systems and resource recovery practices can be found in the previous literature (4, 5).

### Calculation of PF and NF in the Net Environmental Benefit Method

In the net environmental benefit (NEB) method (Eq. 1), three simplified indicators were used as environmental cost metrics (NF, dimensionless), defined as shown below:

$$NF_j(a) = \frac{\sum_{k=1}^n NF_{j,k}}{n}, \quad [S1]$$

where  $a$  represents the scenario,  $j$  represents the environmental cost metric (i.e., energy consumption, GHG emissions, or chemical use), and the operator  $NF_{j,k}$  was estimated as follows:

$$NF_{j,k} = \frac{p_{j,k} - \min(p_{j,1}, p_{j,2}, \dots, p_{j,n})}{\max(p_{j,1}, p_{j,2}, \dots, p_{j,n}) - \min(p_{j,1}, p_{j,2}, \dots, p_{j,n})}, \quad [S2]$$

where  $p_{j,k}$  is the raw value of alternative wastewater treatment system  $k$  for the environmental cost categories (energy consumption, kilowatt-hours per cubic meter of treated water; GHG emissions, kilograms of carbon dioxide equivalent per cubic meter of treated water; chemical use, kilograms per cubic meter of treated water).

The additional indices used to estimate the environmental benefits generated by the resource recovery practices (PF, dimensionless) were defined as shown below:

$$PF_i(a) = \frac{\sum_{k=1}^n PF_{i,k}}{n}, \quad [S3]$$

where the subscript  $i$  specifies the environmental gain metric (i.e., bioenergy recovery performance, recycling of sludge on agricultural fields, or struvite capture potential), and the operator  $PF_{i,k}$  was estimated as follows:

$$PF_{i,k} = \frac{q_{i,k} - \min(q_{i,1}, q_{i,2}, \dots, q_{i,n})}{\max(q_{i,1}, q_{i,2}, \dots, q_{i,n}) - \min(q_{i,1}, q_{i,2}, \dots, q_{i,n})}, \quad [S4]$$

where  $q_{i,k}$  is the raw value of alternative wastewater treatment system  $k$  for the environmental gain categories [bioenergy re-

covery, kilowatt-hours per cubic meter of treated water; recycling of sludge on agricultural fields, kilograms of N and P per cubic meter of treated water; struvite capture, kilograms of inorganic suspended solids (ISS) per cubic meter of treated water].

Additionally, the subscript  $k$  in the above equations specifies the serial number of the wastewater treatment alternative, whereas the subscript  $n$  specifies the total number of wastewater treatment systems assessed ( $n = 6$ ). Table S3 presents the calculated values for all assessment metrics for each scenario (scenarios 1, 2, 3, and 4).

### Data Sources for Determining Metric Interactions

For some environmental performance metrics (EPMs), there was a directly available dataset. For instance, national energy consumption data (MkWh/cap-y) obtained from the US Energy Information Administration (USEIA) database (6) were used to weight the impact of the  $NF_{ener}$  metric. For the  $NF_{chem}$  metric, chemical import data (\$1,000/cap-y) were obtained from the database (7) of the Organisation for Economic Co-operation and Development (OECD) and used in the weighting estimates. Another set of USIEA data (8), bioenergy production using wastes as feedstock (kWh/cap-y), was used to weight the impact of the  $PF_{bioe}$  metric.

The relationship of the other EPMs with the available data were more indirect. To weight the role of the  $PF_{slud}$  metric, municipal waste generation (t/cap-y) extracted from the OECD database (7) was used, because recycling nutrients from WAS on agricultural fields is regarded as an appropriate means of waste disposal. For the  $PF_{stru}$  metric, a dataset for phosphate exploitation (t/cap-y) obtained from the British Geological Survey (9) was applied for weighting, because the remaining accessible reserves of phosphate rock are estimated to be depleted in 50 y if the growth of demand for fertilizers remains at 3% per year (10, 11); struvite is generally viewed as the optimal phosphate mineral for recovery as it contains 51.8% P<sub>2</sub>O<sub>5</sub> (10, 11). Additionally, for the  $NF_{gre}$  metric, the inventory data used for weighting would ideally represent total GHG emissions (e.g., CO<sub>2</sub>, N<sub>2</sub>O, CH<sub>4</sub>, etc.); however, the required data at a national level for the studied time period are scarce and frequently proprietary. Thus, as an alternative, data on CO<sub>2</sub> emissions from power consumption (t CO<sub>2</sub>/cap-y) derived from the USEIA database (12) were used to weight the role of the  $NF_{gre}$  metric, because CO<sub>2</sub> releases from energy consumption are generally considered to be a large proportion (>80%) of total GHG emissions (13).

### Forecasting Model for Metric Interactions

For the modeling approach presented in the text, the algorithm of the autoregressive integrated moving average (ARIMA) ( $p, d, q$ ) model provided in IBM SPSS Statistics 21.0 (SPSS) was used to fit the historic trends for each weighted set for developed and developing countries during the study period of 1991–2009, and subsequently to search for the best-fitting model parameters for each weighting coefficient (Table S4). Model validation was performed to evaluate the generated models using observed data for 2010. Comparisons between the observed and predicted results are presented in Fig. S2. There were small relative differences between the observed and predicted values (within 5% and 10% for developed and developing countries, respectively), demonstrating that the generated models provided good time-series descriptions for each weighting coefficient.

1. McCarty PL, Bae J, Kim J (2011) Domestic wastewater treatment as a net energy producer—can this be achieved? *Environ Sci Technol* 45(17):7100–7106.
2. Wang H, et al. (2008) Technological options for the management of biosolids. *Environ Sci Pollut Res Int* 15(4):308–317.
3. Le Corre KS, Valsami-Jones E, Hobbs P, Parsons SA (2009) Phosphorus recovery from wastewater by struvite crystallization: A review. *Crit Rev Environ Sci Technol* 39(6): 433–477.
4. Wang X, Liu J, Ren NQ, Duan Z (2012) Environmental profile of typical anaerobic/ anoxic/oxic wastewater treatment systems meeting increasingly stringent treatment standards from a life cycle perspective. *Bioresour Technol* 126:31–40.
5. Wang X, et al. (2012) Assessment of multiple sustainability demands for wastewater treatment alternatives: A refined evaluation scheme and case study. *Environ Sci Technol* 46(10):5542–5549.
6. US Energy Information Administration (1990–2010) *International Energy Statistics: Total Energy (Consumption & Intensity)*. Available at [www.eia.gov/countries/data.cfm#undefined](http://www.eia.gov/countries/data.cfm#undefined). Accessed November 4, 2012.
7. Organisation for Economic Co-operation and Development (1990–2010) *OECD Statistics*. Available at [stats.oecd.org](http://stats.oecd.org). Accessed November 4, 2012.
8. US Energy Information Administration (1990–2010) *International Energy Statistics: Renewables (Electricity Generation)*. Available at [www.eia.gov/countries/data.cfm#undefined](http://www.eia.gov/countries/data.cfm#undefined). Accessed November 4, 2012.
9. British Geological Survey (1990–2010) *World Mineral Statistics: Phosphate Rock*. Available at [www.bgs.ac.uk/mineralsuk/statistics/worldArchive.html](http://www.bgs.ac.uk/mineralsuk/statistics/worldArchive.html). Accessed November 4, 2012.
10. Elser J, Bennett E (2011) Phosphorus cycle: A broken biogeochemical cycle. *Nature* 478(7367):29–31.
11. Gilbert N (2009) Environment: The disappearing nutrient. *Nature* 461(7265):716–718.
12. US Energy Information Administration (1990–2010) *International Energy Statistics: Carbon Dioxide Emissions*. Available at [www.eia.gov/countries/data.cfm#undefined](http://www.eia.gov/countries/data.cfm#undefined). Accessed November 4, 2012.
13. US Energy Information Administration (2012) *International Energy Outlook*. Available at [www.eia.gov/ieol/](http://www.eia.gov/ieol/). Accessed December 20, 2013.

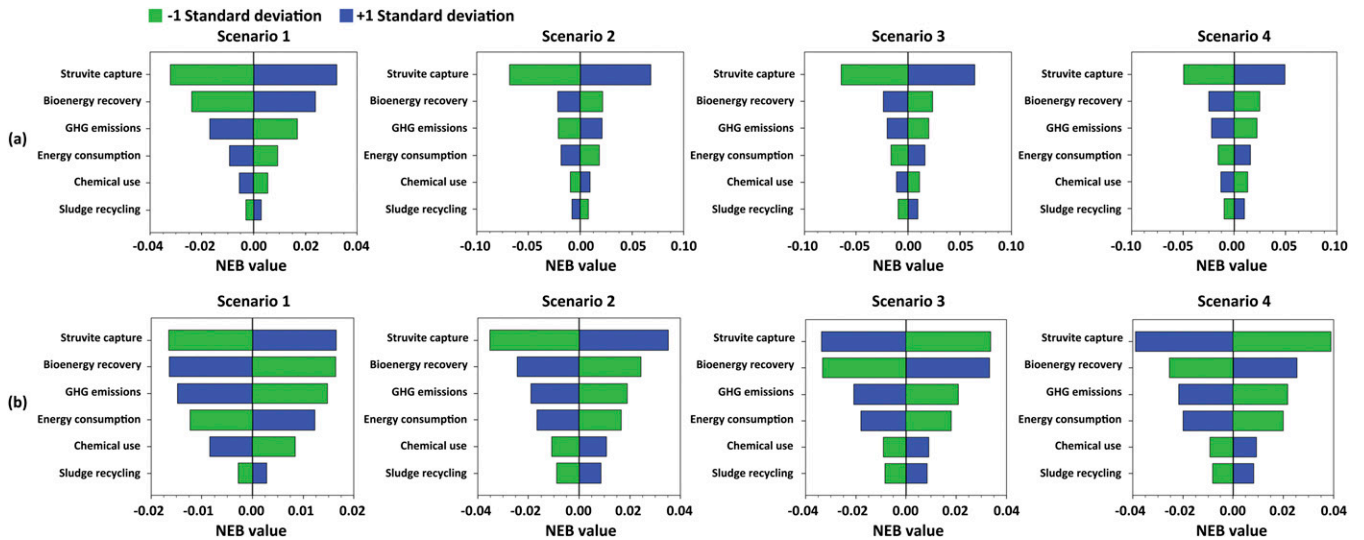

Fig. S1. Sensitivity test of the weighting coefficients for the NEBs associated with each scenario for the emerging WWTP approach for (A) developed countries and (B) developing countries.



**Table S2. Simplified description of the wastewater treatment alternatives**

| Treatment system   | Simplified description                                                                                                                                                                                                                                                             |
|--------------------|------------------------------------------------------------------------------------------------------------------------------------------------------------------------------------------------------------------------------------------------------------------------------------|
| Alternative 1 (A1) | A1 presents the conventional anaerobic/anoxic/oxic (A <sup>2</sup> /O) process.                                                                                                                                                                                                    |
| Alternative 2 (A2) | A2 portrays one optimization of the conventional A <sup>2</sup> /O process that cancels the mixed liquor recirculation (MLR). One obvious feature of this system is that its return activated sludge (RAS) rate is higher than that of the conventional A <sup>2</sup> /O process. |
| Alternative 3 (A3) | A3 presents another modification of the conventional A <sup>2</sup> /O process, with a focus on RAS distribution. In this system, RAS is returned not only to the anaerobic zone (20% of the total RAS) but also to the anoxic zone (80% of the total RAS).                        |
| Alternative 4 (A4) | A4 describes another optimization of the conventional A <sup>2</sup> /O process, the University of Cape Town (UCT) process, which provides an adjustment for MLR and RAS.                                                                                                          |
| Alternative 5 (A5) | A5 presents the most common conventional reversed A <sup>2</sup> /O process.                                                                                                                                                                                                       |
| Alternative 6 (A6) | A6 employs a step-feed mode based on A5. In this system, 80% of the influent flows to the anoxic zone, whereas the rest is distributed in the anaerobic zone.                                                                                                                      |

**Table S3. Mean values of the assessment metrics associated with each scenario for the conventional and emerging WWTP approaches**

| Assessment metric                  | Emerging WWTP approach |            |            |            | Conventional WWTP approach |            |            |            |
|------------------------------------|------------------------|------------|------------|------------|----------------------------|------------|------------|------------|
|                                    | Scenario 1             | Scenario 2 | Scenario 3 | Scenario 4 | Scenario 1                 | Scenario 2 | Scenario 3 | Scenario 4 |
| GHG emissions ( $NF_{gree}$ )      | 0.588                  | 0.755      | 0.822      | 0.862      | 0.590                      | 0.775      | 0.833      | 0.912      |
| Energy consumption ( $NF_{ener}$ ) | 0.341                  | 0.674      | 0.732      | 0.813      | 0.097                      | 0.299      | 0.351      | 0.430      |
| Chemical use ( $NF_{chem}$ )       | 0.383                  | 0.569      | 0.784      | 0.907      | 0.050                      | 0.235      | 0.451      | 0.598      |
| Bioenergy recovery ( $PF_{bioe}$ ) | 0.217                  | 0.621      | 0.587      | 0.446      | —                          | —          | —          | —          |
| Sludge recycling ( $PF_{slud}$ )   | 0.111                  | 0.347      | 0.362      | 0.371      | —                          | —          | —          | —          |
| Struvite capture ( $PF_{stru}$ )   | 0.747                  | 0.492      | 0.379      | 0.366      | —                          | —          | —          | —          |

**Table S4. Parameters in the ARIMA ( $p, d, q$ ) model for the weighting coefficients**

| Weighting coefficient             | Developed countries |     |     | Developing countries |     |     |
|-----------------------------------|---------------------|-----|-----|----------------------|-----|-----|
|                                   | $p$                 | $d$ | $q$ | $p$                  | $d$ | $q$ |
| Energy consumption ( $w_{ener}$ ) | 0                   | 1   | 0   | 0                    | 2   | 2   |
| GHG emissions ( $w_{gree}$ )      | 0                   | 1   | 0   | 0                    | 1   | 0   |
| Chemical use ( $w_{chem}$ )       | 0                   | 0   | 1   | 0                    | 1   | 1   |
| Bioenergy recovery ( $w_{bioe}$ ) | 0                   | 1   | 0   | 0                    | 1   | 0   |
| Sludge recycling ( $w_{slud}$ )   | 0                   | 1   | 0   | 0                    | 1   | 0   |
| Struvite capture ( $w_{stru}$ )   | 0                   | 1   | 1   | 0                    | 1   | 0   |
